# Supplementary material for: Angiotensin II Type 1 receptor (AGTR1) gene polymorphisms are associated with vascular manifestations in patients with systemic sclerosis (SSc)
Source: PubMed Central journal article supplement — J Renin Angiotensin Aldosterone Syst. 2016 Aug 3;17(3):1470320316659954. doi: 10.1177/1470320316659954 (PMC5843913; doi:10.1177/1470320316659954), 2016-08-03
Supplement: jraas-2016-0019.pdf [file jraas-2016-0019.pdf]

**Supplementary table 1.** Information about the different SNPs studied

|                     | Gene<br>polymorphism | rs code               | Chromosomal Location      |
|---------------------|----------------------|-----------------------|---------------------------|
| <b>ACE</b>          | A239T                | ACE rs4291 A/T        | 17q23.3, promoter region  |
|                     | A7941G               | ACE rs4318 A/G        | 17q23.3, exon1, codon 1   |
|                     | A10539G              | ACE rs4335 A/G        | 17q23.3, intron 15        |
|                     | A11599G              | ACE rs4343 A/G        | 17q23.3, exon 16, codon 3 |
|                     | A11599G              | ACE rs4344 A/G        | 17q23.3, intron 17        |
|                     | A15990G              | ACE rs4353 A/G        | 17q23.3, intron 19        |
|                     | A20060G              | ACE rs4363 A/G        | 17q23.3, intron 13        |
| <b>AGTR1</b>        | A-777T               | AGTR1 rs275651<br>A/T | 3q24, promoter region     |
|                     | G-680T               | AGTR1 rs275652<br>G/T | 3q24, promoter region     |
|                     | A-119G               | AGTR1 rs275653<br>A/G | 3q24, promoter region     |
|                     | C43732T              | AGTR1 rs5182 T/C      | 3q24, exon 3, codon 3     |
|                     | A44221G              | AGTR1 rs5183 A/G      | 3q24, exon 3, codon 3     |
| <b>Endothelin 1</b> | -1394 T/G            | Edn1 rs1800541<br>G/T | 6p24.1                    |
|                     | Glu105Glu            | Edn1 rs5369 A/G       | 6p24.1                    |

---

-974 C/A

Edn1 rs3087459

6p24.1

A/C

---

**Supplementary table 2.** Associations of SNPs with presence of systemic sclerosis (SSc)

| Gene                            | SSc                                            | Healthy                                         | P value | OR   | 95% CI    |
|---------------------------------|------------------------------------------------|-------------------------------------------------|---------|------|-----------|
| polymorphism                    | patients<br>(n=170<br>patients/340<br>alleles) | controls<br>(n=199<br>controls/<br>398 alleles) |         |      |           |
| <b>ACE rs4291 A/T (A239T)</b>   |                                                |                                                 |         |      |           |
| <b>Allele</b>                   | N (a.f.)                                       | N (a.f.)                                        |         |      |           |
| <b>A</b>                        | 247 (0.725)                                    | 301 (0.757)                                     | 0.6     | 0.82 | 0.39-1.72 |
| <b>T</b>                        | 93 (0.275)                                     | 97 (0.243)                                      | 0.4     | 1.18 | 0.78-1.78 |
| <b>Genotype</b>                 | N (g.f.)                                       | N (g.f.)                                        |         |      |           |
| <b>AA</b>                       | 93 (0.545)                                     | 117 (0.589)                                     | 0.42    | 0.84 | 0.55-1.27 |
| <b>AT</b>                       | 61 (0.36)                                      | 67 (0.335)                                      | 0.73    | 1.1  | 0.71-1.69 |
| <b>TT</b>                       | 16 (0.096)                                     | 15 (0.076)                                      | 0.64    | 1.2  | 0.61-2.66 |
| <b>ACE rs4318 A/G (A7941G)</b>  |                                                |                                                 |         |      |           |
| <b>Allele</b>                   | N (a.f.)                                       | N (a.f.)                                        |         |      |           |
| <b>A</b>                        | 337 (0.991)                                    | 394 (0.99)                                      | 1.0     | 1.1  | 0.21-6.45 |
| <b>G</b>                        | 3 (0.009)                                      | 4 (0.01)                                        | 1.0     | 0.88 | 0.16-4.6  |
| <b>Genotype</b>                 | N (g.f.)                                       | N (g.f.)                                        |         |      |           |
| <b>AA</b>                       | 167 (0.982)                                    | 195 (0.98)                                      | 1.0     | 1.1  | 0.21-6.5  |
| <b>AG</b>                       | 3 (0.018)                                      | 4 (0.02)                                        | 1.0     | 0.88 | 0.15-4.7  |
| <b>GG</b>                       | 0                                              | 0                                               | -       | -    | -         |
| <b>ACE rs4335 A/G (A10539G)</b> |                                                |                                                 |         |      |           |

|                                 |             |             |      |      |           |
|---------------------------------|-------------|-------------|------|------|-----------|
| <b>Allele</b>                   | N (a.f.)    | N (a.f.)    |      |      |           |
| <b>A</b>                        | 213 (0.627) | 259 (0.65)  | 0.66 | 1.14 | 0.63-2.03 |
| <b>G</b>                        | 127 (0.373) | 139 (0.35)  | 0.13 | 1.40 | 0.9-2.12  |
| <b>Genotype</b>                 | N (g.f.)    | N (g.f.)    |      |      |           |
| <b>AA</b>                       | 67 (0.394)  | 91 (0.454)  | 0.26 | 0.77 | 0.5-1.19  |
| <b>AG</b>                       | 79 (0.466)  | 77 (0.389)  | 0.16 | 1.38 | 0.89-2.13 |
| <b>GG</b>                       | 24 (0.14)   | 31 (0.157)  | 0.80 | 0.89 | 0.4-1.65  |
| <b>ACE rs4343 A/G (A11599G)</b> |             |             |      |      |           |
| <b>Allele</b>                   | N (a.f.)    | N (a.f.)    |      |      |           |
| <b>A</b>                        | 214 (0.629) | 261 (0.656) | 0.72 | 1.1  | 0.62-1.97 |
| <b>G</b>                        | 126 (0.371) | 137 (0.344) | 0.23 | 1.28 | 0.84-1.92 |
| <b>Genotype</b>                 | N (g.f.)    | N (g.f.)    |      |      |           |
| <b>AA</b>                       | 68 (0.40)   | 93 (0.464)  | 0.23 | 0.76 | 0.49-1.17 |
| <b>AG</b>                       | 78 (0.46)   | 75 (0.38)   | 0.13 | 1.4  | 0.90-2.17 |
| <b>GG</b>                       | 24 (0.14)   | 31 (0.156)  | 0.80 | 0.89 | 0.4-1.6   |
| <b>ACE rs4344 A/G (A11599G)</b> |             |             |      |      |           |
| <b>Allele</b>                   | N (a.f.)    | N (a.f.)    |      |      |           |
| <b>A</b>                        | 203 (0.598) | 253 (0.635) | 0.97 | 0.99 | 0.57-1.69 |
| <b>G</b>                        | 137 (0.402) | 145 (0.365) | 0.23 | 1.28 | 0.84-1.95 |
| <b>Genotype</b>                 | N (g.f.)    | N (g.f.)    |      |      |           |
| <b>AA</b>                       | 64 (0.376)  | 89 (0.449)  | 0.38 | 0.81 | 0.53-1.26 |
| <b>AG</b>                       | 75 (0.444)  | 75 (0.373)  | 0.25 | 1.31 | 0.84-2.02 |
| <b>GG</b>                       | 31 (0.18)   | 35 (0.178)  | 0.97 | 1.0  | 0.59-1.84 |

**ACE rs4353 A/G (A15990G)**

| <b>Allele</b>   | N (a.f.)   | N (a.f.)    |      |      |           |
|-----------------|------------|-------------|------|------|-----------|
| <b>A</b>        | 136 (0.40) | 148 (0.372) | 0.47 | 1.13 | 0.83-1.53 |
| <b>G</b>        | 204 (0.60) | 250 (0.628) | 0.47 | 0.89 | 0.65-1.21 |
| <b>Genotype</b> | N (g.f.)   | N (g.f.)    |      |      |           |
| <b>AA</b>       | 31 (0.18)  | 35 (0.178)  | 0.97 | 1.05 | 0.59-1.84 |
| <b>AG</b>       | 74 (0.438) | 78 (0.39)   | 0.46 | 1.20 | 0.77-1.85 |
| <b>GG</b>       | 65 (0.382) | 86 (0.432)  | 0.38 | 0.81 | 0.52-1.26 |

**ACE rs4363 A/G (A200060G)**

| <b>Allele</b>   | N (a.f.)    | N (a.f.)   |      |      |           |
|-----------------|-------------|------------|------|------|-----------|
| <b>A</b>        | 213 (0.626) | 251 (0.63) | 0.69 | 1.15 | 0.64-1.92 |
| <b>G</b>        | 127 (0.374) | 147 (0.37) | 0.67 | 1.09 | 0.72-1.66 |
| <b>Genotype</b> | N (g.f.)    | N (g.f.)   |      |      |           |
| <b>AA</b>       | 71 (0.416)  | 87 (0.438) | 0.78 | 0.92 | 0.60-1.43 |
| <b>AG</b>       | 71 (0.421)  | 77 (0.387) | 0.62 | 1.14 | 0.73-1.76 |
| <b>GG</b>       | 28 (0.163)  | 35 (0.175) | 0.88 | 0.92 | 0.52-1.65 |

**AGTR1 rs275651 A/T (A777T)**

| <b>Allele</b>   | N (a.f.)    | N (a.f.)    |      |      |            |
|-----------------|-------------|-------------|------|------|------------|
| <b>A</b>        | 27 (0.078)  | 32 (0.080)  | 0.79 | 0.92 | 0.51-1.66  |
| <b>T</b>        | 313 (0.921) | 366 (0.919) | 0.68 | 0.65 | 0.10-3.97  |
| <b>Genotype</b> | N (g.f.)    | N (g.f.)    |      |      |            |
| <b>AA</b>       | 3 (0.017)   | 2 (0.011)   | 0.66 | 1.77 | 0.24-15.30 |
| <b>AT</b>       | 21 (0.124)  | 28 (0.139)  | 0.74 | 0.86 | 0.45-1.64  |

|                                    |             |             |      |      |           |
|------------------------------------|-------------|-------------|------|------|-----------|
| <b>TT</b>                          | 146 (0.860) | 169 (0.850) | 0.91 | 1.08 | 0.58-2.01 |
| <b>AGTR1 rs275652 G/T (G-680T)</b> |             |             |      |      |           |
| <b>Allele</b>                      | N (a.f.)    | N (a.f.)    |      |      |           |
| <b>G</b>                           | 28 (0.082)  | 30 (0.074)  | 0.81 | 1.07 | 0.59-1.94 |
| <b>T</b>                           | 312 (0.918) | 368 (0.925) | 1    | 0.64 | 0.10-3.92 |
| <b>Genotype</b>                    | N (g.f.)    | N (g.f.)    |      |      |           |
| <b>GG</b>                          | 3 (0.017)   | 2 (0.01)    | 0.66 | 1.77 | 0.24-15.3 |
| <b>GT</b>                          | 22 (0.129)  | 26 (0.13)   | 0.90 | 0.99 | 0.52-1.89 |
| <b>TT</b>                          | 145 (0.854) | 171 (0.86)  | 0.98 | 0.95 | 0.51-1.77 |
| <b>AGTR1 rs275653 A/G (A-119G)</b> |             |             |      |      |           |
| <b>Allele</b>                      | N (a.f.)    | N (a.f.)    |      |      |           |
| <b>A</b>                           | 310 (0.913) | 365 (0.916) | 0.7  | 1.34 | 0.29-6.08 |
| <b>G</b>                           | 30 (0.087)  | 33 (0.084)  | 0.76 | 1.09 | 0.61-1.95 |
| <b>Genotype</b>                    | N (g.f.)    | N (g.f.)    |      |      |           |
| <b>AA</b>                          | 143 (0.843) | 170 (0.854) | 0.83 | 0.9  | 0.49-1.66 |
| <b>AG</b>                          | 24 (0.14)   | 25 (0.124)  | 0.77 | 1.14 | 0.6-2.18  |
| <b>GG</b>                          | 3 (0.017)   | 4 (0.022)   | 1.0  | 0.88 | 0.15-4.70 |
| <b>AGTR1 rs5182 T/C (C43732T)</b>  |             |             |      |      |           |
| <b>Allele</b>                      | N (a.f.)    | N (a.f.)    |      |      |           |
| <b>T</b>                           | 205 (0.604) | 211 (0.53)  | 0.16 | 1.45 | 0.86-2.45 |
| <b>C</b>                           | 135 (0.396) | 187 (0.47)  | 0.07 | 0.67 | 0.43-1.04 |
| <b>Genotype</b>                    | N (g.f.)    | N (g.f.)    |      |      |           |
| <b>TT</b>                          | 64 (0.376)  | 58 (0.29)   | 0.10 | 1.47 | 0.93-2.32 |

|                                       |             |             |      |      |            |
|---------------------------------------|-------------|-------------|------|------|------------|
| <b>TC</b>                             | 77 (0.455)  | 95 (0.48)   | 0.71 | 0.91 | 0.59-1.40  |
| <b>CC</b>                             | 29 (0.169)  | 46 (0.23)   | 0.18 | 0.68 | 0.39-1.18  |
| <b>AGTR1 rs5183 A/G (A44221G)</b>     |             |             |      |      |            |
| <b>Allele</b>                         | N (a.f.)    | N (a.f.)    |      |      |            |
| <b>A</b>                              | 333 (0.98)  | 381 (0.957) | 0.13 | 2.12 | 0.82-5.71  |
| <b>G</b>                              | 7 (0.02)    | 17 (0.043)  | 0.13 | 0.45 | 0.18-1.22  |
| <b>Genotype</b>                       | N (g.f.)    | N (g.f.)    |      |      |            |
| <b>AA</b>                             | 163 (0.961) | 182 (0.916) | 0.13 | 2.18 | 0.82-5.95  |
| <b>AG</b>                             | 7 (0.039)   | 17 (0.084)  | 0.13 | 0.46 | 0.17-1.21  |
| <b>GG</b>                             | 0           | 0           | -    | -    | -          |
| <b>Edn1 RS1800541 G/T (-1394 T/G)</b> |             |             |      |      |            |
| <b>Allele</b>                         | N (a.f.)    | N (a.f.)    |      |      |            |
| <b>G</b>                              | 34 (0.10)   | 38 (0.095)  | 0.79 | 1.07 | 0.62-1.86  |
| <b>T</b>                              | 306 (0.90)  | 360 (0.905) | 1.0  | 1.03 | 0.06-16.71 |
| <b>Genotype</b>                       | N (g.f.)    | N (g.f.)    |      |      |            |
| <b>GG</b>                             | 1 (0.006)   | 1 (0.005)   | 1.0  | 1.17 | 0-43.1     |
| <b>GT</b>                             | 32 (0.188)  | 36 (0.178)  | 0.96 | 1.05 | 0.6-1.84   |
| <b>TT</b>                             | 137 (0.806) | 162 (0.814) | 0.94 | 0.95 | 0.55-1.65  |
| <b>Edn1 rs5369 A/G (Glu105Glu)</b>    |             |             |      |      |            |
| <b>Allele</b>                         | N (a.f.)    | N (a.f.)    |      |      |            |
| <b>A</b>                              | 21 (0.0617) | 15 (0.037)  | 0.17 | 1.68 | 0.79-3.57  |
| <b>G</b>                              | 319 (0.938) | 383 (0.963) | 1    | 0.97 | 0.94-1.04  |
| <b>Genotype</b>                       | N (g.f.)    | N (g.f.)    |      |      |            |

---

|                                      |             |             |      |      |            |
|--------------------------------------|-------------|-------------|------|------|------------|
| <b>AA</b>                            | 1 (0.006)   | 0           | 0.46 | -    | -          |
| <b>AG</b>                            | 19 (0.112)  | 15 (0.074)  | 0.30 | 1.54 | 0.72-3.32  |
| <b>GG</b>                            | 150 (0.882) | 184 (0.926) | 0.22 | 0.61 | 0.29-1.3   |
| <b>Edn1 rs3087459 A/C (-974 C/A)</b> |             |             |      |      |            |
| <b>Allele</b>                        | N (a.f.)    | N (a.f.)    |      |      |            |
| <b>A</b>                             | 307 (0.903) | 355 (0.893) | 1    | 1.03 | 0.06-16.71 |
| <b>C</b>                             | 33 (0.097)  | 43 (0.107)  | 0.68 | 0.88 | 0.51-1.52  |
| <b>Genotype</b>                      | N (g.f.)    | N (g.f.)    |      |      |            |
| <b>AA</b>                            | 138 (0.812) | 157 (0.79)  | 0.67 | 1.15 | 0.67-1.99  |
| <b>AC</b>                            | 31 (0.182)  | 41 (0.205)  | 0.65 | 0.86 | 0.69-1.23  |
| <b>CC</b>                            | 1 (0.006)   | 1 (0.005)   | 1.0  | 1.17 | 0-43.16    |

---

a.f.: allele frequency, g.f.: genotype frequency



**Supplementary Table 3.** Associations of SNPs with Systemic Sclerosis (SSc) subset

| Gene                            | dcSSc patients<br>(n=77 patients/154 alleles) | lcSSc patients<br>(n=93 patients/<br>186 alleles) | P value | OR   | 95% CI    |
|---------------------------------|-----------------------------------------------|---------------------------------------------------|---------|------|-----------|
| <b>ACE rs4291 A/T (A239T)</b>   |                                               |                                                   |         |      |           |
| <b>Allele</b>                   | N (a.f.)                                      | N (a.f.)                                          |         |      |           |
| <b>A</b>                        | 123 (0.799)                                   | 125 (0.674)                                       | 0.012*  | 1.94 | 1.14-3.29 |
| <b>T</b>                        | 31 (0.201)                                    | 61 (0.325)                                        | 0.012*  | 0.52 | 0.30-0.88 |
| <b>Genotype</b>                 | N (g.f.)                                      | N (g.f.)                                          |         |      |           |
| <b>AA</b>                       | 51 (0.657)                                    | 42 (0.455)                                        | 0.006*  | 2.48 | 1.26-4.89 |
| <b>AT</b>                       | 21 (0.284)                                    | 41 (0.438)                                        | 0.03*   | 0.48 | 0.24-0.95 |
| <b>TT</b>                       | 5 (0.06)                                      | 10 (0.107)                                        | 0.48    | 0.58 | 0.16-1.95 |
| <b>ACE rs4318 A/G (A7941G)</b>  |                                               |                                                   |         |      |           |
| <b>Allele</b>                   | N (a.f.)                                      | N (a.f.)                                          |         |      |           |
| <b>A</b>                        | 152 (0.987)                                   | 178 (1.0)                                         | 0.21    | 0    | 0-3.52    |
| <b>G</b>                        | 2 (0.013)                                     | 0                                                 | 0.21    | -    | -         |
| <b>Genotype</b>                 | N (g.f.)                                      | N (g.f.)                                          |         |      |           |
| <b>AA</b>                       | 75 (0.974)                                    | 89 (1.0)                                          | 0.21    | 0    | 0-3.50    |
| <b>AG</b>                       | 2 (0.026)                                     | 0                                                 | 0.21    | -    | -         |
| <b>GG</b>                       | 0                                             | 0                                                 | -       | -    | -         |
| <b>ACE rs4335 A/G (A10539G)</b> |                                               |                                                   |         |      |           |

|                                 |            |             |      |       |           |
|---------------------------------|------------|-------------|------|-------|-----------|
| <b>Allele</b>                   | N (a.f.)   | N (a.f.)    |      |       |           |
| <b>A</b>                        | 99 (0.641) | 114 (0.612) | 0.50 | 1.37  | 0.54-3.5  |
| <b>G</b>                        | 55 (0.358) | 72 (0.387)  | 0.79 | 0.91  | 0.47-1.75 |
| <b>Genotype</b>                 | N (g.f.)   | N (g.f.)    |      |       |           |
| <b>AA</b>                       | 31 (0.403) | 36 (0.382)  | 0.96 | 1.07  | 0.55-2.07 |
| <b>AG</b>                       | 37 (0.478) | 42 (0.461)  | 0.82 | 1.12  | 0.59-2.15 |
| <b>GG</b>                       | 9 (0.119)  | 15 (0.157)  | 0.54 | 0.69  | 0.26-1.81 |
| <b>ACE rs4343 A/G (A11599G)</b> |            |             |      |       |           |
| <b>Allele</b>                   | N (a.f.)   | N (a.f.)    |      |       |           |
| <b>A</b>                        | 100 (0.65) | 114 (0.612) | 0.64 | 1.37  | 0.54-3.5  |
| <b>G</b>                        | 54 (0.35)  | 72 (0.388)  | 0.65 | 0.86  | 0.45-1.64 |
| <b>Genotype</b>                 | N (g.f.)   | N (g.f.)    |      |       |           |
| <b>AA</b>                       | 32 (0.418) | 36 (0.382)  | 0.82 | 1.13  | 0.58-2.18 |
| <b>AG</b>                       | 36 (0.463) | 42 (0.461)  | 0.95 | 1.07  | 0.56-2.05 |
| <b>GG</b>                       | 9 (0.119)  | 15 (0.157)  | 0.54 | 0.69  | 0.26-1.81 |
| <b>ACE rs4344 A/G (A11599G)</b> |            |             |      |       |           |
| <b>Allele</b>                   | N (a.f.)   | N (a.f.)    |      |       |           |
| <b>A</b>                        | 94 (0.612) | 112 (0.601) | 0.85 | 1.08  | 0.47-2.45 |
| <b>G</b>                        | 60 (0.388) | 74 (0.399)  | 0.98 | 1.006 | 0.52-1.92 |
| <b>Genotype</b>                 | N (g.f.)   | N (g.f.)    |      |       |           |
| <b>AA</b>                       | 31 (0.403) | 37 (0.393)  | 0.92 | 1.02  | 0.53-1.98 |
| <b>AG</b>                       | 32 (0.418) | 38 (0.412)  | 0.94 | 1.03  | 0.53-1.99 |
| <b>GG</b>                       | 14 (0.179) | 18 (0.195)  | 0.99 | 0.93  | 0.40-2.15 |

---

| <b>ACE rs4353 A/G (A15990G)</b>   |            |             |      |      |           |
|-----------------------------------|------------|-------------|------|------|-----------|
| <b>Allele</b>                     | N (a.f.)   | N (a.f.)    |      |      |           |
| <b>A</b>                          | 62 (0.403) | 74 (0.399)  | 0.98 | 1.02 | 0.64-1.61 |
| <b>G</b>                          | 92 (0.597) | 112 (0.601) | 0.98 | 0.98 | 0.62-1.55 |
| <b>Genotype</b>                   | N (g.f.)   | N (g.f.)    |      |      |           |
| <b>AA</b>                         | 15 (0.194) | 17 (0.18)   | 0.99 | 1.08 | 0.47-2.5  |
| <b>AG</b>                         | 32 (0.418) | 40 (0.438)  | 0.97 | 0.94 | 0.49-1.82 |
| <b>GG</b>                         | 30 (0.388) | 36 (0.382)  | 0.90 | 1.01 | 0.52-1.97 |
| <b>ACE rs4363 A/G (A200060G)</b>  |            |             |      |      |           |
| <b>Allele</b>                     | N (a.f.)   | N (a.f.)    |      |      |           |
| <b>A</b>                          | 95 (0.62)  | 116 (0.623) | 0.94 | 1.03 | 0.44-2.41 |
| <b>G</b>                          | 59 (0.38)  | 70 (0.377)  | 0.87 | 1.05 | 0.55-2.0  |
| <b>Genotype</b>                   | N (g.f.)   | N (g.f.)    |      |      |           |
| <b>AA</b>                         | 31 (0.403) | 39 (0.42)   | 0.94 | 0.93 | 0.48-1.81 |
| <b>AG</b>                         | 33 (0.433) | 38 (0.41)   | 0.91 | 1.09 | 0.56-2.10 |
| <b>GG</b>                         | 13 (0.164) | 16 (0.169)  | 0.88 | 0.98 | 0.41-2.34 |
| <b>AGTR1 rs275651 A/T (A777T)</b> |            |             |      |      |           |
| <b>Allele</b>                     | N (a.f.)   | N (a.f.)    |      |      |           |
| <b>A</b>                          | 11 (0.07)  | 15 (0.078)  | 0.99 | 0.99 | 0.39-2.51 |
| <b>T</b>                          | 143 (0.93) | 171 (0.921) | 0.5  | 1.77 | 1.54-2.03 |
| <b>Genotype</b>                   | N (g.f.)   | N (g.f.)    |      |      |           |
| <b>AA</b>                         | 0          | 2 (0.022)   | 0.60 | -    | -         |
| <b>AT</b>                         | 11 (0.14)  | 11 (0.115)  | 0.80 | 1.24 | 0.47-3.32 |

---

|                                    |             |             |      |      |           |
|------------------------------------|-------------|-------------|------|------|-----------|
| <b>TT</b>                          | 66 (0.86)   | 80 (0.862)  | 0.86 | 0.98 | 0.38-2.52 |
| <b>AGTR1 rs275652 G/T (G-680T)</b> |             |             |      |      |           |
| <b>Allele</b>                      | N (a.f.)    | N (a.f.)    |      |      |           |
| <b>G</b>                           | 10 (0.067)  | 16 (0.084)  | 0.83 | 0.9  | 0.36-2.26 |
| <b>T</b>                           | 144 (0.933) | 170 (0.915) | 0.5  | 1.77 | 1.54-2.03 |
| <b>Genotype</b>                    | N (g.f.)    | N (g.f.)    |      |      |           |
| <b>GG</b>                          | 0           | 2 (0.022)   | 0.67 | -    | -         |
| <b>GT</b>                          | 10 (0.134)  | 12 (0.124)  | 0.83 | 1.01 | 0.37-2.69 |
| <b>TT</b>                          | 67 (0.866)  | 79 (0.854)  | 0.86 | 1.19 | 0.46-3.11 |
| <b>AGTR1 rs275653 A/G (A-119G)</b> |             |             |      |      |           |
| <b>Allele</b>                      | N (a.f.)    | N (a.f.)    |      |      |           |
| <b>A</b>                           | 142 (0.925) | 169 (0.91)  | 0.5  | 1.77 | 1.54-2.03 |
| <b>G</b>                           | 12 (0.075)  | 17 (0.09)   | 0.89 | 0.94 | 0.38-2.26 |
| <b>Genotype</b>                    | N (g.f.)    | N (g.f.)    |      |      |           |
| <b>AA</b>                          | 65 (0.85)   | 78 (0.843)  | 0.90 | 1.04 | 0.42-2.58 |
| <b>AG</b>                          | 12 (0.15)   | 13 (0.135)  | 0.93 | 1.14 | 0.45-2.87 |
| <b>GG</b>                          | 0           | 2 (0.022)   | 0.50 | -    | -         |
| <b>AGTR1 rs5182 T/C (C43732T)</b>  |             |             |      |      |           |
| <b>Allele</b>                      | N (a.f.)    | N (a.f.)    |      |      |           |
| <b>T</b>                           | 100 (0.65)  | 110 (0.59)  | 0.89 | 1.06 | 0.44-2.56 |
| <b>C</b>                           | 54 (0.35)   | 76 (0.41)   | 0.16 | 0.62 | 0.32-1.2  |
| <b>Genotype</b>                    | N (g.f.)    | N (g.f.)    |      |      |           |
| <b>TT</b>                          | 34 (0.448)  | 32 (0.35)   | 0.25 | 1.51 | 0.77-2.94 |

|                                       |             |             |      |      |           |
|---------------------------------------|-------------|-------------|------|------|-----------|
| <b>TC</b>                             | 32 (0.403)  | 46 (0.49)   | 0.38 | 0.73 | 0.38-1.40 |
| <b>CC</b>                             | 11 (0.149)  | 15 (0.16)   | 0.90 | 0.87 | 0.34-2.17 |
| <b>AGTR1 rs5183 A/G (A44221G)</b>     |             |             |      |      |           |
| <b>Allele</b>                         | N (a.f.)    | N (a.f.)    |      |      |           |
| <b>A</b>                              | 153 (0.992) | 181 (0.972) | 0.22 | 4.23 | 0.47-96.6 |
| <b>G</b>                              | 1 (0.007)   | 5 (0.028)   | 0.23 | 0.25 | 0.02-2.23 |
| <b>Genotype</b>                       | N (g.f.)    | N (g.f.)    |      |      |           |
| <b>AA</b>                             | 76 (98.5)   | 88 (0.944)  | 0.23 | 4.32 | 0.47-99.8 |
| <b>AG</b>                             | 1 (0.015)   | 5 (0.056)   | 0.22 | 0.23 | 0.01-2.11 |
| <b>GG</b>                             | 0           | 0           | -    | -    | -         |
| <b>Edn1 RS1800541 G/T (-1394 T/G)</b> |             |             |      |      |           |
| <b>Allele</b>                         | N (a.f.)    | N (a.f.)    |      |      |           |
| <b>G</b>                              | 16 (0.106)  | 19 (0.101)  | 1    | 0.96 | 0.43-2.16 |
| <b>T</b>                              | 138 (0.894) | 167 (0.899) | 0.44 | 2.29 | 1.91-2.75 |
| <b>Genotype</b>                       | N (g.f.)    | N (g.f.)    |      |      |           |
| <b>GG</b>                             | 1 (0.015)   | 0           | 0.67 | -    | -         |
| <b>GT</b>                             | 14 (0.182)  | 19 (0.202)  | 0.86 | 0.87 | 0.37-1.99 |
| <b>TT</b>                             | 62 (0.803)  | 74 (0.798)  | 0.96 | 1.06 | 0.47-2.42 |
| <b>Edn1 rs5369 A/G (Glu105Glu)</b>    |             |             |      |      |           |
| <b>Allele</b>                         | N (a.f.)    | N (a.f.)    |      |      |           |
| <b>A</b>                              | 9 (0.06)    | 9 (0.047)   | 0.60 | 1.31 | 0.46-3.69 |
| <b>G</b>                              | 145 (0.94)  | 177 (0.953) | 0.86 | 0.82 | 0.29-2.32 |
| <b>Genotype</b>                       | N (g.f.)    | N (g.f.)    |      |      |           |

|                                      |             |             |      |      |           |
|--------------------------------------|-------------|-------------|------|------|-----------|
| <b>AA</b>                            | 0           | 0           | -    | -    | -         |
| <b>AG</b>                            | 9 (0.12)    | 9 (0.095)   | 0.86 | 1.24 | 0.42-3.62 |
| <b>GG</b>                            | 68 (0.88)   | 84 (0.905)  | 0.86 | 0.81 | 0.28-2.37 |
| <b>Edn1 rs3087459 A/C (-974 C/A)</b> |             |             |      |      |           |
| <b>Allele</b>                        | N (a.f.)    | N (a.f.)    |      |      |           |
| <b>A</b>                             | 139 (0.901) | 167 (0.899) | 0.44 | 2.29 | 1.91-2.75 |
| <b>C</b>                             | 15 (0.098)  | 19 (0.101)  | 0.75 | 0.87 | 0.38-1.99 |
| <b>Genotype</b>                      | N (g.f.)    | N (g.f.)    |      |      |           |
| <b>AA</b>                            | 63 (0.818)  | 74 (79.8)   | 0.86 | 1.16 | 0.5-2.67  |
| <b>AC</b>                            | 13 (0.167)  | 19 (0.202)  | 0.69 | 0.79 | 0.34-1.84 |
| <b>CC</b>                            | 1 (0.015)   | 0           | 0.45 | -    | -         |

\*p value after logistic regression analysis was non-significant, dcSSc: diffuse cutaneous systemic sclerosis, lcSSc: limited cutaneous systemic sclerosis, a.f.: allele frequency, g.f.: genotype frequency

**Supplementary Table 4.** Associations of SNPs with severe vascular involvement ("Medsger severity scale" scores 3-4)

| Gene                           | Severe                                                       | No severe                                                    | P value | OR   | 95% CI    |
|--------------------------------|--------------------------------------------------------------|--------------------------------------------------------------|---------|------|-----------|
| polymorphism                   | <b>vascular involvement</b><br>(n= 79 patients/ 158 alleles) | <b>vascular involvement</b><br>(n= 80 patients/ 160 alleles) |         |      |           |
| <b>ACE rs4291 A/T (A239T)</b>  |                                                              |                                                              |         |      |           |
| <b>Allele</b>                  | N (a.f.)                                                     | N (a.f.)                                                     |         |      |           |
| <b>A</b>                       | 119 (0.753)                                                  | 112 (0.70)                                                   | 0.27    | 1.87 | 0.6-5.87  |
| <b>T</b>                       | 39 (0.247)                                                   | 48 (0.30)                                                    | 0.37    | 0.75 | 0.40-1.41 |
| <b>Genotype</b>                | N (g.f.)                                                     | N (g.f.)                                                     |         |      |           |
| <b>AA</b>                      | 46 (0.582)                                                   | 41 (0.513)                                                   | 0.46    | 1.33 | 0.68-2.60 |
| <b>AT</b>                      | 27 (0.342)                                                   | 30 (0.375)                                                   | 0.78    | 0.87 | 0.43-1.74 |
| <b>TT</b>                      | 6 (0.076)                                                    | 9 (0.113)                                                    | 0.60    | 0.65 | 0.19-2.13 |
| <b>ACE rs4318 A/G (A7941G)</b> |                                                              |                                                              |         |      |           |
| <b>Allele</b>                  | N (a.f.)                                                     | N (a.f.)                                                     |         |      |           |
| <b>A</b>                       | 156 (0.987)                                                  | 160 (1.0)                                                    | 0.24    | -    | -         |
| <b>G</b>                       | 2 (0.013)                                                    | 0                                                            | -       | -    | -         |
| <b>Genotype</b>                | N (g.f.)                                                     | N (g.f.)                                                     |         |      |           |
| <b>AA</b>                      | 77 (0.975)                                                   | 80 (1.0)                                                     | 0.24    | -    | -         |
| <b>AG</b>                      | 2 (0.025)                                                    | 0                                                            | -       | -    | -         |
| <b>GG</b>                      | 0                                                            | 0                                                            | -       | -    | -         |

**ACE rs4335 A/G (A10539G)**

|                 |             |            |      |      |           |
|-----------------|-------------|------------|------|------|-----------|
| <b>Allele</b>   | N (a.f.)    | N (a.f.)   |      |      |           |
| <b>A</b>        | 103 (0.651) | 96 (0.60)  | 0.12 | 2.04 | 0.81-5.14 |
| <b>G</b>        | 55 (0.349)  | 64 (0.40)  | 0.82 | 0.92 | 0.49-1.75 |
| <b>Genotype</b> | N (g.f.)    | N (g.f.)   |      |      |           |
| <b>AA</b>       | 32 (0.405)  | 31 (0.388) | 0.94 | 1.08 | 0.54-2.14 |
| <b>AG</b>       | 39 (0.494)  | 34 (0.425) | 0.47 | 1.32 | 0.67-2.59 |
| <b>GG</b>       | 8 (10.1)    | 15 (0.188) | 0.18 | 0.49 | 0.18-1.33 |

**ACE rs4343 A/G (A11599G)**

|                 |             |            |      |      |           |
|-----------------|-------------|------------|------|------|-----------|
| <b>Allele</b>   | N (a.f.)    | N (a.f.)   |      |      |           |
| <b>A</b>        | 104 (0.658) | 96 (0.60)  | 0.12 | 2.04 | 0.81-5.14 |
| <b>G</b>        | 54 (0.342)  | 64 (0.40)  | 0.69 | 0.88 | 0.46-1.66 |
| <b>Genotype</b> | N (g.f.)    | N (g.f.)   |      |      |           |
| <b>AA</b>       | 33 (0.418)  | 31 (0.388) | 0.82 | 1.13 | 0.57-2.25 |
| <b>AG</b>       | 38 (0.481)  | 34 (0.425) | 0.58 | 1.25 | 0.64-2.46 |
| <b>GG</b>       | 8 (0.101)   | 15 (0.188) | 0.18 | 0.49 | 0.18-1.33 |

**ACE rs4344 A/G (A11599G)**

|                 |             |            |      |      |           |
|-----------------|-------------|------------|------|------|-----------|
| <b>Allele</b>   | N (a.f.)    | N (a.f.)   |      |      |           |
| <b>A</b>        | 100 (0.633) | 93 (0.582) | 0.23 | 1.62 | 0.72-3.63 |
| <b>G</b>        | 58 (0.367)  | 67 (0.418) | 0.58 | 0.83 | 0.44-1.57 |
| <b>Genotype</b> | N (g.f.)    | N (g.f.)   |      |      |           |
| <b>AA</b>       | 33 (0.418)  | 31 (0.388) | 0.82 | 1.13 | 0.57-2.25 |
| <b>AG</b>       | 34 (0.43)   | 31 (0.388) | 0.69 | 1.19 | 0.60-2.36 |



|                                   |             |             |      |      |           |
|-----------------------------------|-------------|-------------|------|------|-----------|
| <b>GG</b>                         | 12 (0.152)  | 18 (0.225)  | 0.32 | 0.62 | 0.25-1.48 |
| <b>ACE rs4353 A/G (A15990G)</b>   |             |             |      |      |           |
| <b>Allele</b>                     | N (a.f.)    | N (a.f.)    |      |      |           |
| <b>A</b>                          | 61 (0.386)  | 66 (0.412)  | 0.71 | 0.90 | 0.56-1.44 |
| <b>G</b>                          | 97 (0.614)  | 94 (0.587)  | 0.71 | 1.12 | 0.69-1.79 |
| <b>Genotype</b>                   | N (g.f.)    | N (g.f.)    |      |      |           |
| <b>AA</b>                         | 14 (0.177)  | 16 (0.20)   | 0.86 | 0.86 | 0.36-2.05 |
| <b>AG</b>                         | 33 (0.418)  | 34 (0.425)  | 0.94 | 0.97 | 0.49-1.91 |
| <b>GG</b>                         | 32 (0.405)  | 30 (0.375)  | 0.82 | 1.13 | 0.57-2.26 |
| <b>ACE rs4363 A/G (A200060G)</b>  |             |             |      |      |           |
| <b>Allele</b>                     | N (a.f.)    | N (a.f.)    |      |      |           |
| <b>A</b>                          | 102 (0.645) | 96 (0.60)   | 0.3  | 1.54 | 0.66-3.58 |
| <b>G</b>                          | 56 (0.354)  | 64 (0.40)   | 0.69 | 0.88 | 0.46-1.65 |
| <b>Genotype</b>                   | N (g.f.)    | N (g.f.)    |      |      |           |
| <b>AA</b>                         | 34 (0.43)   | 32 (0.40)   | 0.81 | 1.13 | 0.57-2.24 |
| <b>AG</b>                         | 34 (0.43)   | 32 (0.40)   | 0.81 | 1.13 | 0.27-2.24 |
| <b>GG</b>                         | 11 (0.14)   | 16 (0.20)   | 0.41 | 0.65 | 0.26-1.61 |
| <b>AGTR1 rs275651 A/T (A777T)</b> |             |             |      |      |           |
| <b>Allele</b>                     | N (a.f.)    | N (a.f.)    |      |      |           |
| <b>A</b>                          | 15 (0.095)  | 9 (0.056)   | 0.27 | 1.76 | 0.70-4.51 |
| <b>T</b>                          | 143 (0.905) | 151 (0.943) | 0.27 | 0.51 | 0.22-1.43 |
| <b>Genotype</b>                   | N (g.f.)    | N (g.f.)    |      |      |           |
| <b>AA</b>                         | 0           | 2 (0.025)   | 0.49 | 0    | 0-4.14    |

|                                    |             |             |         |      |            |
|------------------------------------|-------------|-------------|---------|------|------------|
| <b>AT</b>                          | 15 (0.19)   | 5 (0.063)   | 0.02*   | 3.52 | 1.11-11.79 |
| <b>TT</b>                          | 64 (0.81)   | 73 (0.913)  | 0.10    | 0.41 | 0.14-1.16  |
| <b>AGTR1 rs275652 G/T (G-680T)</b> |             |             |         |      |            |
| <b>Allele</b>                      | N (a.f.)    | N (a.f.)    |         |      |            |
| <b>G</b>                           | 17 (0.108)  | 8 (0.050)   | 0.02**  | 3.3  | 1.2-9.1    |
| <b>T</b>                           | 141 (0.892) | 152 (0.950) | 0.49    | 2.01 | 1.72-2.35  |
| <b>Genotype</b>                    | N (g.f.)    | N (g.f.)    |         |      |            |
| <b>GG</b>                          | 0           | 2 (0.025)   | 0.49    | -    | -          |
| <b>GT</b>                          | 17 (0.220)  | 4 (0.050)   | 0.006** | 5.2  | 1.6-16.2   |
| <b>TT</b>                          | 62 (0.780)  | 74 (0.925)  | 0.02*   | 0.3  | 0.10-0.86  |
| <b>AGTR1 rs275653 A/G (A-119G)</b> |             |             |         |      |            |
| <b>Allele</b>                      | N (a.f.)    | N (a.f.)    |         |      |            |
| <b>A</b>                           | 139 (0.880) | 152 (0.950) | 0.04*   | 0.39 | 0.15-0.97  |
| <b>G</b>                           | 19 (0.120)  | 8 (0.050)   | 0.008** | 3.9  | 1.4-10.4   |
| <b>Genotype</b>                    | N (g.f.)    | N (g.f.)    |         |      |            |
| <b>AA</b>                          | 60 (0.759)  | 74 (0.925)  | 0.008** | 0.26 | 0.09-0.74  |
| <b>AG</b>                          | 19 (0.241)  | 4 (0.050)   | 0.001** | 6.0  | 1.9-18.6   |
| <b>GG</b>                          | 0           | 2 (0.025)   | 0.49    | -    | -          |
| <b>AGTR1 rs5182 T/C (C43732T)</b>  |             |             |         |      |            |
| <b>Allele</b>                      | N (a.f.)    | N (a.f.)    |         |      |            |
| <b>T</b>                           | 90 (0.570)  | 106 (0.663) | 0.11    | 0.49 | 0.2-1.2    |
| <b>C</b>                           | 68 (0.430)  | 54 (0.337)  | 0.21    | 1.49 | 0.78-2.8   |
| <b>Genotype</b>                    | N (g.f.)    | N (g.f.)    |         |      |            |

|                                       |             |             |      |      |            |
|---------------------------------------|-------------|-------------|------|------|------------|
| <b>TT</b>                             | 27 (0.342)  | 35 (0.438)  | 0.28 | 0.67 | 0.33-1.33  |
| <b>TC</b>                             | 36 (0.456)  | 36(0.450)   | 0.93 | 1.02 | 0.52-2.01  |
| <b>CC</b>                             | 16 (0.203)  | 9 (0.113)   | 0.17 | 2.0  | 0.77-5.32  |
| <b>AGTR1 rs5183 A/G (A44221G)</b>     |             |             |      |      |            |
| <b>Allele</b>                         | N (a.f.)    | N (a.f.)    |      |      |            |
| <b>A</b>                              | 154 (0.975) | 158 (0.987) | 0.44 | 0.49 | 0.06-3.14  |
| <b>G</b>                              | 4 (0.025)   | 2 (0.012)   | 0.44 | 2.0  | 0.37-11.69 |
| <b>Genotype</b>                       | N (g.f.)    | N (g.f.)    |      |      |            |
| <b>AA</b>                             | 75 (0.949)  | 78 (0.975)  | 0.44 | 0.48 | 0.06-3.18  |
| <b>AG</b>                             | 4 (0.051)   | 2 (0.025)   | 0.44 | 2.08 | 0.31-16.9  |
| <b>GG</b>                             | 0           | 0           | -    | -    | -          |
| <b>Edn1 RS1800541 G/T (-1394 T/G)</b> |             |             |      |      |            |
| <b>Allele</b>                         | N (a.f.)    | N (a.f.)    |      |      |            |
| <b>G</b>                              | 144 (0.913) | 139 (0.868) | 0.30 | 1.55 | 0.72-3.37  |
| <b>T</b>                              | 14 (0.087)  | 21 (0.132)  | 0.3  | 0.64 | 0.3-1.39   |
| <b>Genotype</b>                       | N (g.f.)    | N (g.f.)    |      |      |            |
| <b>GG</b>                             | 65 (0.827)  | 60 (0.75)   | 0.35 | 1.55 | 0.67-3.58  |
| <b>GT</b>                             | 14 (0.173)  | 19 (0.237)  | 0.45 | 0.69 | 0.3-1.60   |
| <b>TT</b>                             | 0           | 1 (0.013)   | 1.0  | -    | -          |
| <b>Edn1 rs5369 A/G (Glu105Glu)</b>    |             |             |      |      |            |
| <b>Allele</b>                         | N (a.f.)    | N (a.f.)    |      |      |            |
| <b>A</b>                              | 9 (0.054)   | 8 (0.053)   | 0.95 | 1.03 | 0.36-2.9   |
| <b>G</b>                              | 149 (0.946) | 152 (0.947) | 0.97 | 0.87 | 0.30-2.54  |

| <b>Genotype</b>                      | N (g.f.)    | N (g.f.)    |      |      |           |
|--------------------------------------|-------------|-------------|------|------|-----------|
| <b>AA</b>                            | 0           | 0           | -    | -    | -         |
| <b>AG</b>                            | 9 (0.108)   | 8 (0.105)   | 0.97 | 1.16 | 0.38-3.53 |
| <b>GG</b>                            | 70 (0.892)  | 72 (0.895)  | 0.97 | 0.86 | 0.28-2.62 |
| <b>Edn1 rs3087459 A/C (-974 C/A)</b> |             |             |      |      |           |
| <b>Allele</b>                        | N (a.f.)    | N (a.f.)    |      |      |           |
| <b>A</b>                             | 143 (0.907) | 141 (0.883) | 0.61 | 1.28 | 0.59-2.79 |
| <b>C</b>                             | 15 (0.093)  | 19 (0.117)  | 0.61 | 0.81 | 0.36-1.78 |
| <b>Genotype</b>                      | N (g.f.)    | N (g.f.)    |      |      |           |
| <b>AA</b>                            | 64 (0.813)  | 62 (0.779)  | 0.72 | 1.24 | 0.54-2.86 |
| <b>AC</b>                            | 15 (0.187)  | 17 (0.208)  | 0.87 | 0.87 | 0.37-2.02 |
| <b>CC</b>                            | 0           | 1 (0.013)   | 0.49 | -    | -         |

\*p value after logistic regression analysis was non-significant; \*\*p value after logistic regression analysis was statistically significant and it is shown in Table 2 in the main manuscript, a.f.: allele frequency, g.f.: genotype frequency
